# Supplementary material
Source: PubMed Central journal article supplement (PMC3867159)
Supplement: NIHMS486378-supplement-Supplementary_Materials.pdf [file NIHMS486378-supplement-Supplementary_Materials.pdf]

# Supplementary Material to *Parameter Estimation of Partial Differential Equation Models*

## S.1 Calculation of the Penalty Matrix $\mathbf{R}(\boldsymbol{\theta})$

We have that  $\mathbf{R}(\boldsymbol{\theta})$  is a  $K \times K$  matrix which has  $(j, \ell)^{th}$  entry  $\int f_j(\mathbf{x}; \boldsymbol{\theta}) f_\ell(\mathbf{x}; \boldsymbol{\theta}) d\mathbf{x}$ . Using the notation of matrix integration, we write  $\mathbf{R}(\boldsymbol{\theta}) = \int \mathbf{f}(\mathbf{x}; \boldsymbol{\theta}) \mathbf{f}^T(\mathbf{x}; \boldsymbol{\theta}) d\mathbf{x}$ , where  $\mathbf{f}(\mathbf{x}; \boldsymbol{\theta}) = \{f_1(\mathbf{x}; \boldsymbol{\theta}), \dots, f_K(\mathbf{x}; \boldsymbol{\theta})\}^T$ . In our empirical work and simulations based on the PDE model (2), the penalty matrix  $\mathbf{R}(\boldsymbol{\theta})$  is the summation of 10 matrix integrals of the same structure, defined as

$$\begin{aligned}
 \mathbf{R}(\boldsymbol{\theta}) &= \int_z \int_t \mathbf{f}(t, z; \boldsymbol{\theta}) \mathbf{f}^T(t, z; \boldsymbol{\theta}) dt dz \\
 &= \theta_D^2 \int \frac{\partial^2 \mathbf{b}}{\partial z^2} \frac{\partial^2 \mathbf{b}^T}{\partial z^2} d\mathbf{x} + \theta_S^2 \int \frac{\partial \mathbf{b}}{\partial z} \frac{\partial \mathbf{b}^T}{\partial z} d\mathbf{x} + \theta_A^2 \int \mathbf{b} \mathbf{b}^T d\mathbf{x} \\
 &\quad + \theta_D \theta_S \int \left( \frac{\partial^2 \mathbf{b}}{\partial z^2} \frac{\partial \mathbf{b}^T}{\partial z} + \frac{\partial \mathbf{b}}{\partial z} \frac{\partial^2 \mathbf{b}^T}{\partial z^2} \right) d\mathbf{x} + \theta_D \theta_A \int \left( \frac{\partial^2 \mathbf{b}}{\partial z^2} \mathbf{b}^T + \mathbf{b} \frac{\partial^2 \mathbf{b}^T}{\partial z^2} \right) d\mathbf{x} \\
 &\quad + \theta_S \theta_A \int \left( \frac{\partial \mathbf{b}}{\partial z} \mathbf{b}^T + \mathbf{b} \frac{\partial \mathbf{b}^T}{\partial z} \right) d\mathbf{x} - \theta_D \int \left( \frac{\partial^2 \mathbf{b}}{\partial z^2} \frac{\partial \mathbf{b}^T}{\partial t} + \frac{\partial \mathbf{b}}{\partial t} \frac{\partial^2 \mathbf{b}^T}{\partial z^2} \right) d\mathbf{x} \\
 &\quad - \theta_S \int \left( \frac{\partial \mathbf{b}}{\partial z} \frac{\partial \mathbf{b}^T}{\partial t} + \frac{\partial \mathbf{b}}{\partial t} \frac{\partial \mathbf{b}^T}{\partial z} \right) d\mathbf{x} - \theta_A \int \left( \frac{\partial \mathbf{b}}{\partial t} \mathbf{b}^T + \mathbf{b} \frac{\partial \mathbf{b}^T}{\partial t} \right) d\mathbf{x} + \int \frac{\partial \mathbf{b}}{\partial t} \frac{\partial \mathbf{b}^T}{\partial t} d\mathbf{x} \\
 &\triangleq \sum_{\ell=1}^L r_\ell(\boldsymbol{\theta}) \mathcal{B}_\ell, \tag{S.1}
 \end{aligned}$$

where  $L = 10$ ,  $\mathcal{B}_\ell$  are known constant matrices, and  $r_\ell(\boldsymbol{\theta})$  are known functions of  $\boldsymbol{\theta}$ .

We compute  $\mathcal{B}_\ell$  for  $\ell = 1, \dots, 10$  following the same rule. In general, we can use the composite Simpson's rule repeatedly to evaluate the integrals. For a univariate function  $\phi(x)$  and an even integer  $Q$ , the composite Simpson's rule approximates the integral as

$$\begin{aligned}
 \int_a^b \phi(x) dx &\approx (h/3) \left\{ \phi(x_0) + 2 \sum_{q=1}^{Q/2-1} \phi(x_{2q}) + 4 \sum_{q=1}^{Q/2} \phi(x_{2q-1}) + \phi(x_Q) \right\} \\
 &= (h/3) \sum_{q=0}^Q w_q \phi(x_q),
 \end{aligned}$$

where  $h = (b - a)/Q$ ,  $x_q = a + qh$ , for  $q = 0, 1, \dots, Q$ , are quadrature points, and  $(w_0, w_1, w_2, \dots, w_{Q-2}, w_{Q-1}, w_Q) = (1, 4, 2, 4, \dots, 2, 4, 2, 1)$  assigns weights to quadrature points.

In order to calculate, for example  $\mathcal{B}_3$ , let  $Q_1$  denote the number of quadrature knots in the time domain,  $\mathbf{s}_1 = (t_1, \dots, t_{Q_1})$  the vector of knots, and  $\mathbf{w}_1$  the vector of weights. Similarly,  $Q_2$ ,  $\mathbf{s}_2 = (z_1, \dots, z_{Q_2})$  and  $\mathbf{w}_2$  are the number of quadrature knots, knot vector, and weight

vector in the range domain. Then the  $(i, j)^{th}$  entry  $\mathcal{B}_{3,ij}$  is

$$\mathcal{B}_{3,ij} = \int \int b_i(t, z) b_j(t, z) dt dz \approx (h/3)^2 \sum_{k=1}^{Q_2} \sum_{\ell=1}^{Q_1} w_{1,\ell} w_{2,k} b_i(t_\ell, z_k) b_j(t_\ell, z_k). \quad (\text{S.2})$$

Define  $\mathbf{W}$  as a diagonal matrix with diagonal elements  $\mathbf{w}_1 \otimes \mathbf{w}_2$ . Denote the quadrature points by  $\mathbf{Z} = \{(t_1, z_1), \dots, (t_1, z_{Q_2}), \dots, (t_{Q_1}, z_1), \dots, (t_{Q_1}, z_{Q_2})\}^T$ , and  $\mathbf{B}(\mathbf{Z})$  the matrix of basis function evaluated at the quadrature points. Then the approximation of matrix  $\mathcal{B}_3$  can be expressed neatly as  $\mathcal{B}_3 \approx \mathbf{B}^T(\mathbf{Z})\mathbf{W}\mathbf{B}(\mathbf{Z})$ .

## S.2 Implementation of the Variance Estimator

We propose the variance estimate as

$$\widehat{\Sigma}_{n,\text{prop}} = \mathbf{\Lambda}_n^{-1}(\widehat{\boldsymbol{\theta}}) \mathcal{C}(\widehat{\boldsymbol{\theta}}) \{\mathbf{\Lambda}_n^{-1}(\widehat{\boldsymbol{\theta}})\}^T, \quad (\text{S.3})$$

where  $\mathcal{C}(\widehat{\boldsymbol{\theta}})$  is a matrix whose  $(j, k)^{th}$  element is  $\widehat{\mathcal{C}}_{jk} = n\tilde{\lambda}^4 \widehat{\sigma}_\epsilon^2 \widehat{\boldsymbol{\beta}}^T(\widehat{\boldsymbol{\theta}}) \widehat{\mathcal{W}}_j \mathbf{G}_n^{-1}(\widehat{\boldsymbol{\theta}}) \mathbf{S}_n \mathbf{G}_n^{-1}(\widehat{\boldsymbol{\theta}}) \widehat{\mathcal{W}}_k \widehat{\boldsymbol{\beta}}(\widehat{\boldsymbol{\theta}})$  and  $\mathbf{\Lambda}_n(\widehat{\boldsymbol{\theta}}) = \sum_{i=1}^n \partial \Psi_i(\widehat{\boldsymbol{\theta}}) / \partial \boldsymbol{\theta}^T$ . Here  $\widehat{\sigma}_\epsilon^2$  is the estimated variance of  $\epsilon(\mathbf{x}_i)$  and can be calculated by first fitting a standard spline regression and then forming the residual variance. Also,  $\widehat{\mathcal{W}}_j = \widehat{\mathcal{V}}_j + \widehat{\mathcal{V}}_j^T$ , where  $\widehat{\mathcal{V}}_j = \mathbf{R}(\widehat{\boldsymbol{\theta}}) \mathbf{G}_n^{-1}(\widehat{\boldsymbol{\theta}}) \mathbf{R}_{j\theta}(\widehat{\boldsymbol{\theta}})$ .

The above estimator requires analytic expression of  $\partial \widehat{\boldsymbol{\beta}}(\boldsymbol{\theta}) / \partial \boldsymbol{\theta}$  and  $\partial \Psi_i(\boldsymbol{\theta}) / \partial \boldsymbol{\theta}$ . These quantities could be obtained using the implicit function theorem, which is introduced as follows. Dependence on  $\boldsymbol{\theta}$  is dropped where appropriate.

To find the first-order derivative of  $\widehat{\boldsymbol{\beta}}$  with respect to  $\boldsymbol{\theta}$ , take total derivative with respect to  $\boldsymbol{\theta}$  on both sides of the identity  $\partial J(\boldsymbol{\beta}|\boldsymbol{\theta}) / \partial \boldsymbol{\beta}|_{\widehat{\boldsymbol{\beta}}} = 0$ , we get

$$\frac{d}{d\boldsymbol{\theta}} \left( \frac{\partial J}{\partial \boldsymbol{\beta}} \Big|_{\widehat{\boldsymbol{\beta}}} \right) = \frac{\partial^2 J}{\partial \boldsymbol{\theta}^T \partial \boldsymbol{\beta}} \Big|_{\widehat{\boldsymbol{\beta}}} + \frac{\partial^2 J}{\partial \boldsymbol{\beta}^T \partial \boldsymbol{\beta}} \Big|_{\widehat{\boldsymbol{\beta}}} \frac{\partial \widehat{\boldsymbol{\beta}}}{\partial \boldsymbol{\theta}} = 0.$$

Assuming that  $\partial^2 J / \partial \boldsymbol{\beta}^T \partial \boldsymbol{\beta}|_{\widehat{\boldsymbol{\beta}}}$  is non-singular, which is true for our model, we obtain the analytic expression of the first-order derivative of  $\widehat{\boldsymbol{\beta}}$  as,

$$\frac{\partial \widehat{\boldsymbol{\beta}}}{\partial \boldsymbol{\theta}} = - \left( \frac{\partial^2 J}{\partial \boldsymbol{\beta}^T \partial \boldsymbol{\beta}} \Big|_{\widehat{\boldsymbol{\beta}}} \right)^{-1} \left( \frac{\partial^2 J}{\partial \boldsymbol{\theta}^T \partial \boldsymbol{\beta}} \Big|_{\widehat{\boldsymbol{\beta}}} \right). \quad (\text{S.4})$$

It is easily seen from (7) that

$$\frac{\partial^2 J}{\partial \boldsymbol{\beta}^T \partial \boldsymbol{\beta}} = 2\{\mathbf{B}^T \mathbf{B} + \lambda \mathbf{R}(\boldsymbol{\theta})\}, \quad (\text{S.5})$$

and that

$$\frac{\partial^2 J}{\partial \boldsymbol{\theta}^T \partial \boldsymbol{\beta}} = 2\lambda \frac{\partial}{\partial \boldsymbol{\theta}} \{\mathbf{R}(\boldsymbol{\theta})\boldsymbol{\beta}\}. \quad (\text{S.6})$$

Substitute the above into (S.4) and we have

$$\frac{\partial \widehat{\boldsymbol{\beta}}}{\partial \boldsymbol{\theta}} = -\lambda \{ \mathbf{B}^T \mathbf{B} + \lambda \mathbf{R}(\boldsymbol{\theta}) \}^{-1} \left[ \frac{\partial}{\partial \boldsymbol{\theta}} \{ \mathbf{R}(\boldsymbol{\theta}) \boldsymbol{\beta} \} \Big|_{\widehat{\boldsymbol{\beta}}} \right]. \quad (\text{S.7})$$

The first-order derivative of  $\Psi_i(\boldsymbol{\theta})$  with respect to  $\boldsymbol{\theta}$  is, for  $i = 1, \dots, n$ ,

$$\frac{\partial \Psi_i}{\partial \boldsymbol{\theta}} = \sum_{k=1}^K b_k(\mathbf{x}_i) \{ Y_i - \mathbf{b}^T(\mathbf{x}_i) \widehat{\boldsymbol{\beta}}(\boldsymbol{\theta}) \} \frac{\partial^2 \widehat{\boldsymbol{\beta}}_k}{\partial \boldsymbol{\theta} \partial \boldsymbol{\theta}^T} - \left( \frac{\partial \widehat{\boldsymbol{\beta}}}{\partial \boldsymbol{\theta}} \right)^T \mathbf{b}(\mathbf{x}_i) \mathbf{b}^T(\mathbf{x}_i) \left( \frac{\partial \widehat{\boldsymbol{\beta}}}{\partial \boldsymbol{\theta}} \right).$$

To find the second-order derivative of  $\widehat{\boldsymbol{\beta}}_k$  with respect to  $\boldsymbol{\theta}$ , take the second-order total derivative with respect to  $\boldsymbol{\theta}$  on both sides of the identity  $\partial J / \partial \boldsymbol{\beta}_k |_{\widehat{\boldsymbol{\beta}}_k} = 0$ , we get, for  $k = 1, \dots, K$ ,

$$\begin{aligned} \frac{d^2}{d\boldsymbol{\theta}^T d\boldsymbol{\theta}} \left( \frac{\partial J}{\partial \boldsymbol{\beta}_k} \Big|_{\widehat{\boldsymbol{\beta}}_k} \right) &= \frac{d}{d\boldsymbol{\theta}^T} \left\{ \frac{d}{d\boldsymbol{\theta}} \left( \frac{\partial J}{\partial \boldsymbol{\beta}_k} \Big|_{\widehat{\boldsymbol{\beta}}_k} \right) \right\} \\ &= \frac{\partial^3 J}{\partial \boldsymbol{\theta} \partial \boldsymbol{\theta}^T \partial \boldsymbol{\beta}_k} \Big|_{\widehat{\boldsymbol{\beta}}_k} + \frac{\partial^3 J}{\partial \boldsymbol{\theta} \partial \boldsymbol{\beta}_k^2} \Big|_{\widehat{\boldsymbol{\beta}}_k} \frac{\partial \widehat{\boldsymbol{\beta}}_k}{\partial \boldsymbol{\theta}^T} + \frac{\partial^2 J}{\partial \boldsymbol{\beta}_k^2} \Big|_{\widehat{\boldsymbol{\beta}}_k} \frac{\partial^2 \widehat{\boldsymbol{\beta}}_k}{\partial \boldsymbol{\theta} \partial \boldsymbol{\theta}^T} \\ &\quad + \frac{\partial^3 J}{\partial \boldsymbol{\beta}_k^3} \Big|_{\widehat{\boldsymbol{\beta}}_k} \frac{\partial \widehat{\boldsymbol{\beta}}_k}{\partial \boldsymbol{\theta}} \frac{\partial \widehat{\boldsymbol{\beta}}_k}{\partial \boldsymbol{\theta}^T} = \mathbf{0}. \end{aligned}$$

Obviously for our method, we have that  $\partial^3 J / \partial \boldsymbol{\beta}_k^3 \equiv 0$ , so the last term in the above result disappears. Assuming that  $\partial^2 J / \partial \boldsymbol{\beta}_k^2 |_{\widehat{\boldsymbol{\beta}}_k} \neq 0$ , then the analytic expression for the second-order derivative of  $\widehat{\boldsymbol{\beta}}_k$  is obtained as,

$$\frac{\partial^2 \widehat{\boldsymbol{\beta}}_k}{\partial \boldsymbol{\theta} \partial \boldsymbol{\theta}^T} = - \left( \frac{\partial^2 J}{\partial \boldsymbol{\beta}_k^2} \Big|_{\widehat{\boldsymbol{\beta}}_k} \right)^{-1} \left( \frac{\partial^3 J}{\partial \boldsymbol{\theta} \partial \boldsymbol{\theta}^T \partial \boldsymbol{\beta}_k} \Big|_{\widehat{\boldsymbol{\beta}}_k} + \frac{\partial^3 J}{\partial \boldsymbol{\theta} \partial \boldsymbol{\beta}_k^2} \Big|_{\widehat{\boldsymbol{\beta}}_k} \frac{\partial \widehat{\boldsymbol{\beta}}_k}{\partial \boldsymbol{\theta}^T} \right). \quad (\text{S.8})$$

To complete the calculation, we need to know the following quantities,

$$\frac{\partial \mathbf{R}(\boldsymbol{\theta}) \boldsymbol{\beta}}{\partial \boldsymbol{\theta}}, \quad \frac{\partial^3 J}{\partial \boldsymbol{\theta} \partial \boldsymbol{\theta}^T \partial \boldsymbol{\beta}_k}, \quad \text{and} \quad \frac{\partial^3 J}{\partial \boldsymbol{\theta} \partial \boldsymbol{\beta}_k^2},$$

all of which involve derivatives of  $\mathbf{R}(\boldsymbol{\theta})$  with respect to  $\boldsymbol{\theta}$ . The ensuing derivation depends on the particular PDE model of interest.

### S.2.1 Implementation with PDE Example (2)

We explain in this section the calculation of above model dependent quantities, in the context of the PDE model (2). We know

$$\mathbf{f}(\mathbf{x}; \boldsymbol{\theta}) = \frac{\partial \mathbf{b}(\mathbf{x})}{\partial t} - \theta_D \frac{\partial^2 \mathbf{b}(\mathbf{x})}{\partial z^2} - \theta_S \frac{\partial \mathbf{b}(\mathbf{x})}{\partial z} - \theta_A \mathbf{b}(\mathbf{x}),$$

where  $\mathbf{b}(\mathbf{x}) = \{b_1(\mathbf{x}), \dots, b_K(\mathbf{x})\}^\top$  is the vector of basis functions. The matrix  $\mathbf{R}(\boldsymbol{\theta})$  is shown in (S.1). In this example, the coefficients of matrices  $\mathcal{B}_\ell$ 's are

$$\begin{aligned} r_1(\boldsymbol{\theta}) &= \theta_D^2, & r_2(\boldsymbol{\theta}) &= \theta_S^2, & r_3(\boldsymbol{\theta}) &= \theta_A^2, & r_4(\boldsymbol{\theta}) &= \theta_D\theta_S, & r_5(\boldsymbol{\theta}) &= \theta_D\theta_A, \\ r_6(\boldsymbol{\theta}) &= \theta_S\theta_A, & r_7(\boldsymbol{\theta}) &= -\theta_D, & r_8(\boldsymbol{\theta}) &= -\theta_S, & r_9(\boldsymbol{\theta}) &= -\theta_A, & r_{10}(\boldsymbol{\theta}) &= 1. \end{aligned}$$

Then we have

$$\begin{aligned} \frac{\partial \mathbf{R}(\boldsymbol{\theta})\boldsymbol{\beta}}{\partial \boldsymbol{\theta}} &= \frac{\partial}{\partial \boldsymbol{\theta}} \sum_{\ell=1}^L r_\ell(\boldsymbol{\theta})\mathcal{B}_\ell\boldsymbol{\beta} \\ &= \sum_{\ell=1}^L \mathcal{B}_\ell\boldsymbol{\beta} \frac{\partial r_\ell(\boldsymbol{\theta})}{\partial \boldsymbol{\theta}^\top}. \end{aligned}$$

Notice that  $(\partial^2 J / \partial \boldsymbol{\theta} \partial \boldsymbol{\beta}_k)^\top$  is the  $k^{\text{th}}$  row of  $\partial^2 J / \partial \boldsymbol{\theta}^\top \partial \boldsymbol{\beta}$  given in (S.6). Let  $\tilde{\mathbf{b}}_{\ell,k}$  be the  $k^{\text{th}}$  row of  $\mathcal{B}_\ell$ , then  $\mathcal{B}_\ell = (\tilde{\mathbf{b}}_{\ell,1}^\top, \dots, \tilde{\mathbf{b}}_{\ell,K}^\top)^\top$ . Then, we could write

$$\frac{\partial^2 J}{\partial \boldsymbol{\theta} \partial \boldsymbol{\beta}_k} = 2\lambda \sum_{\ell=1}^L \tilde{\mathbf{b}}_{\ell,k} \boldsymbol{\beta} \frac{\partial r_\ell(\boldsymbol{\theta})}{\partial \boldsymbol{\theta}}.$$

Then

$$\frac{\partial^3 J}{\partial \boldsymbol{\theta} \partial \boldsymbol{\theta}^\top \partial \boldsymbol{\beta}_k} = 2\lambda \sum_{\ell=1}^L \tilde{\mathbf{b}}_{\ell,k} \boldsymbol{\beta} \frac{\partial^2 r_\ell(\boldsymbol{\theta})}{\partial \boldsymbol{\theta} \partial \boldsymbol{\theta}^\top}. \quad (\text{S.9})$$

In this simulated example

$$\frac{\partial^2 r_1(\boldsymbol{\theta})}{\partial \boldsymbol{\theta} \partial \boldsymbol{\theta}^\top} = \begin{pmatrix} 2 & 0 & 0 \\ 0 & 0 & 0 \\ 0 & 0 & 0 \end{pmatrix}, \quad \frac{\partial^2 r_2(\boldsymbol{\theta})}{\partial \boldsymbol{\theta} \partial \boldsymbol{\theta}^\top} = \begin{pmatrix} 0 & 0 & 0 \\ 0 & 2 & 0 \\ 0 & 0 & 0 \end{pmatrix}, \quad \frac{\partial^2 r_3(\boldsymbol{\theta})}{\partial \boldsymbol{\theta} \partial \boldsymbol{\theta}^\top} = \begin{pmatrix} 0 & 0 & 0 \\ 0 & 0 & 0 \\ 0 & 0 & 2 \end{pmatrix},$$

and  $\frac{\partial^2 r_\ell(\boldsymbol{\theta})}{\partial \boldsymbol{\theta} \partial \boldsymbol{\theta}^\top} \equiv \mathbf{0}$ , for  $\ell = 4, \dots, 10$ . Notice that  $\partial^2 J / \partial \boldsymbol{\beta}_k^2$  is the  $k^{\text{th}}$  diagonal element of  $\partial^2 J / \partial \boldsymbol{\beta}^\top \partial \boldsymbol{\beta}$  given in (S.5), then

$$\frac{\partial^3 J}{\partial \boldsymbol{\theta} \partial \boldsymbol{\beta}_k^2} = 2\lambda \sum_{\ell=1}^L \mathcal{B}_\ell(k, k) \frac{\partial r_\ell(\boldsymbol{\theta})}{\partial \boldsymbol{\theta}}, \quad (\text{S.10})$$

where  $\mathcal{B}_\ell(k, k)$  is the  $k^{\text{th}}$  diagonal element of the matrix  $\mathcal{B}_\ell$ .

Finally, substituting  $\partial^2 J / \partial \boldsymbol{\beta}_k^2$ , (S.9) and (S.10) into (S.8) results in the expression of  $\partial^2 \hat{\boldsymbol{\beta}}_k / \partial \boldsymbol{\theta} \partial \boldsymbol{\theta}^\top$ . The matrices  $\mathcal{B}_1, \dots, \mathcal{B}_{10}$  are calculated using Simpson's rule, see to **Supplemental Material** Appendix S.1 for detailed calculation.
